# Supplementary material for: Phase control of nanostructured iron oxide for application to biosensor
Source: Royal Society of Chemistry journal article supplement (doi:10.1039/c2tb00192f), 2012-11-02
Supplement: c2tb00192f.pdf [file c2tb00192f.pdf]

## Phase Control of Nanostructured Iron Oxide for Application to Biosensor

Rachna Sharma<sup>1,3</sup>, Ved Varun Agrawal<sup>1,\*</sup>, A. K. Srivastava<sup>1</sup>, Govind<sup>1</sup>, Lata Nain<sup>2</sup>, Imran Chaudhary<sup>1</sup>, Soumya Ranjan Kabi<sup>2</sup>, R. K. Sinha<sup>3</sup>, and B. D. Malhotra<sup>4,\*</sup>

<sup>1</sup>National Physical Laboratory, New Delhi-110012, India

<sup>2</sup>Division of Microbiology, Indian Agricultural Research Institute, New Delhi-110012, India

<sup>3</sup>Department of Applied Physics, Delhi Technological University, New Delhi- 110042, India

<sup>4</sup>Department of Biotechnology, Delhi Technological University, New Delhi- 110042, India

E-mail: [agrawalvv@nplindia.org](mailto:agrawalvv@nplindia.org); [bansi.malhotra@gmail.com](mailto:bansi.malhotra@gmail.com)

### SEM Studies

Fig. S1 (a) and S1 (b) show micrographs of the ChOx immobilized  $\alpha$ -Fe<sub>2</sub>O<sub>3</sub> films (obtained from Fe<sub>3</sub>O<sub>4</sub> NPs and Fe<sub>3</sub>O<sub>4</sub> NPs (autoclaved), respectively). The change in morphology from dense uniform distribution of NPs in the nanoscale to the globular structure of ChOx in the micron scale is attributed to physical adsorption of ChOx molecules onto  $\alpha$ -Fe<sub>2</sub>O<sub>3</sub> films<sup>1</sup>. Fig. S1 (c) and S1 (d) show the micrographs of ChOx immobilized Fe<sub>3</sub>O<sub>4</sub>@ C and Fe<sub>3</sub>O<sub>4</sub>@ SiO<sub>2</sub> films, respectively. The globular structure obtained in the micron scale (characteristic of proteins and enzymes) reveal the enzyme (cholesterol oxidase) immobilization onto the carbon and silica capped Fe<sub>3</sub>O<sub>4</sub> films<sup>2</sup>.

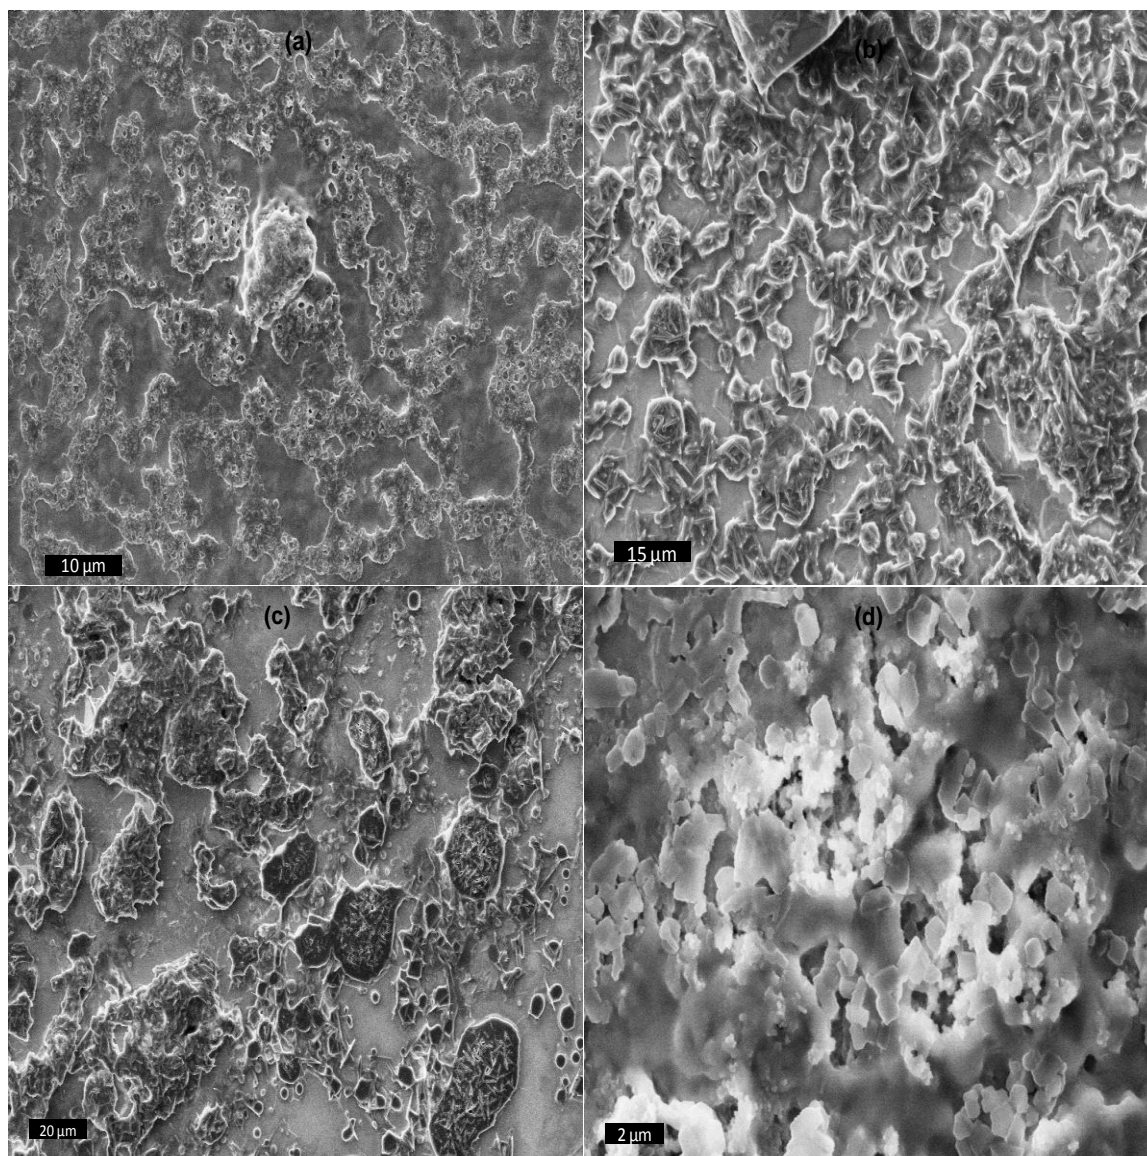

**Fig. S1** SEM micrographs after ChOx immobilization onto: (a)  $\alpha$ -Fe<sub>2</sub>O<sub>3</sub> NPs film obtained from Fe<sub>3</sub>O<sub>4</sub> NPs; (b)  $\alpha$ -Fe<sub>2</sub>O<sub>3</sub> NPs film obtained from Fe<sub>3</sub>O<sub>4</sub> NPs (autoclaved); (c) film of Fe<sub>3</sub>O<sub>4</sub>@ C NPs; (d) film of Fe<sub>3</sub>O<sub>4</sub>@ SiO<sub>2</sub> NPs.

## Shelf life Studies

The shelf-life of the ChOx/  $\text{Fe}_3\text{O}_4@ \text{C}$  film/ITO and ChOx/  $\alpha\text{-Fe}_2\text{O}_3$  film/ITO bioelectrodes has been investigated using cyclic voltammetry for  $100 \text{ mgdL}^{-1}$  cholesterol concentration. The activity of the bioelectrodes has been investigated at regular interval of 7 days. The ChOx/  $\text{Fe}_3\text{O}_4@ \text{C}$  film/ITO bioelectrode exhibits only 6% reduction in peak current after 10 weeks [Fig. S2 (a)] while ChOx/  $\alpha\text{-Fe}_2\text{O}_3$  film/ITO bioelectrode exhibits 11.5% decrease in the peak current [Fig. S2 (b)] after 10 weeks when stored at  $4^\circ\text{C}$ . Thus, the shelf life of the ChOx/  $\text{Fe}_3\text{O}_4@ \text{C}$  film/ITO bioelectrode has been found to be 10 weeks over the shelf life of 8 weeks for the ChOx/  $\alpha\text{-Fe}_2\text{O}_3$  film/ITO bioelectrode within 95 % accuracy.

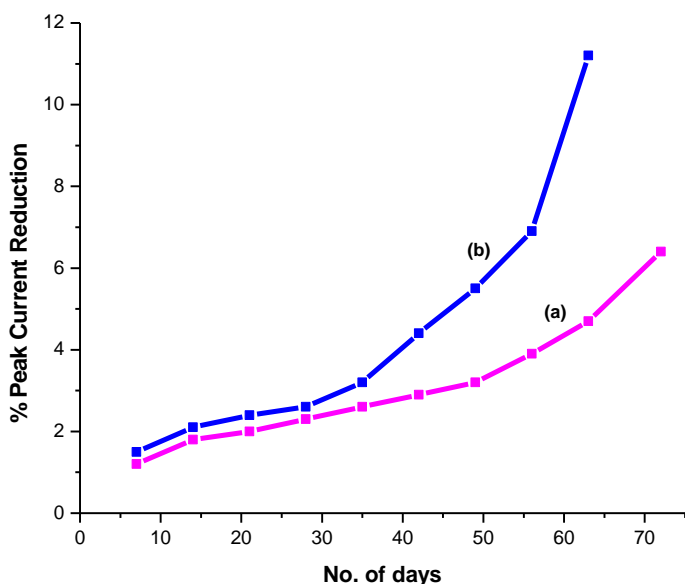

**Fig. S2** Shelf life curves showing % reduction in peak current with time (a) ChOx/ $\text{Fe}_3\text{O}_4@ \text{C}$  film/ITO bioelectrode, and; (b) ChOx/ $\alpha\text{-Fe}_2\text{O}_3$  film/ITO bioelectrode.

## Reproducibility Studies

The reproducibility of the ChOx/  $\text{Fe}_3\text{O}_4@ \text{C}$  film/ITO and ChOx/  $\alpha\text{-Fe}_2\text{O}_3$  film/ITO bioelectrodes has been studied with cholesterol concentration of  $25 \text{ mgdL}^{-1}$  and it has been found that the ChOx/  $\text{Fe}_3\text{O}_4@ \text{C}$  film/ITO bioelectrode can be used upto 25 times without significant decrease ( $40 \mu\text{A}$ ) of the signal [Fig. S3 (a)]. Under similar conditions, the ChOx/  $\alpha\text{-Fe}_2\text{O}_3$  film/ITO bioelectrode can be used upto 20 times with insignificant loss ( $66 \mu\text{A}$ ) of the signal [Fig. S3 (b)].

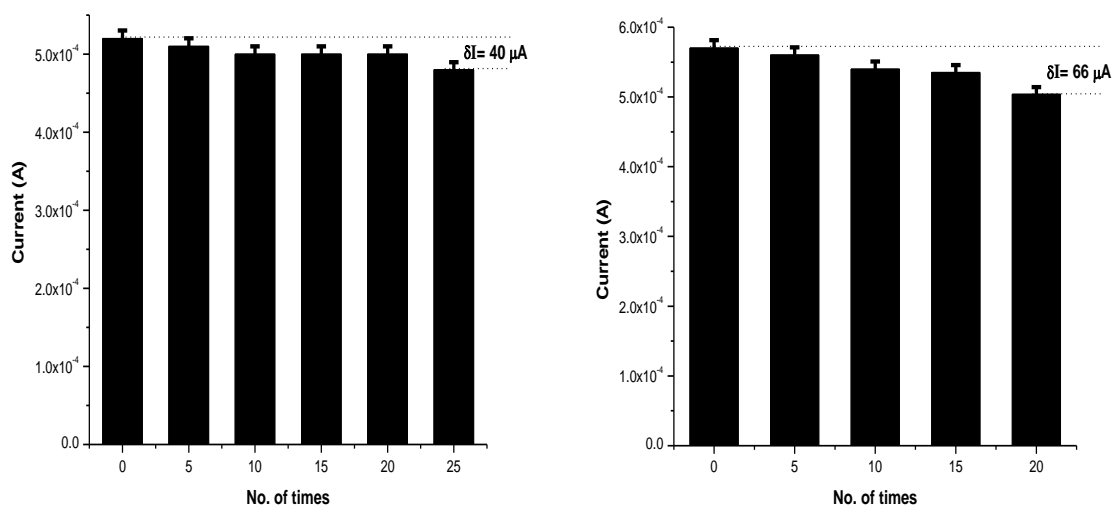

**Fig. S3** Reproducibility curve showing reduction in peak current with no. of usage times (a) ChOx/ $\text{Fe}_3\text{O}_4@ \text{C}$  film/ITO bioelectrode, and; (b) ChOx/ $\alpha\text{-Fe}_2\text{O}_3$  film/ITO bioelectrode.

## Response time Studies

The response time of the ChOx/  $\text{Fe}_3\text{O}_4@ \text{C}$  film/ITO and ChOx/  $\alpha\text{-Fe}_2\text{O}_3$  film/ITO bioelectrodes has been investigated using cyclic voltammetry for the cholesterol concentration of  $100 \text{ mgdL}^{-1}$ . The oxidation peak current shows linear rise in current initially and then saturate afterwards. The time after which the current shows no further increase in current has been taken as the response time and the response time of both the bioelectrodes have been found as 60 s.

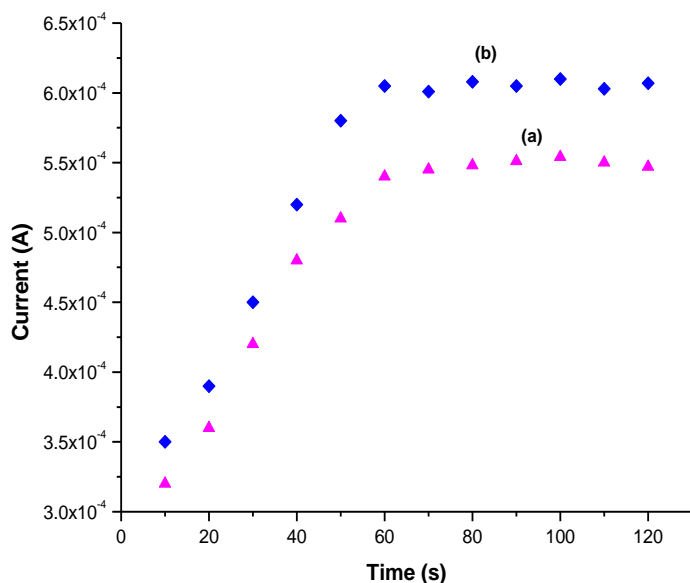

**Fig. S4** Response time curve showing variation of peak current with time (a) ChOx/ $\text{Fe}_3\text{O}_4@ \text{C}$  film/ITO bioelectrode, and; (b) ChOx/ $\alpha\text{-Fe}_2\text{O}_3$  film/ITO bioelectrode.

## References

- 1) Z. Matharu, P. Pandey, *Electroanalysis*, 2009, **21**, 1587.
- 2) Z. Matharu, G. Sumana, *Langmuir* 2007, **23**, 13188.
